# Supplementary material
Source: bioRxiv or medRxiv preprint supplement (https://medrxiv.org/highwire/filestream/71826/field_highwire_adjunct_files/0/2020.02.04.20020487-1.pdf)
Supplement: Supplementary file [file 2020.02.04.20020487-1.pdf]

Epidemiology of pediatric cancers in the Northwest Region of Cameroon: a research protocol

Rohit Borah and Dr. Francine Kouya

December 2017

## **Abstract:**

**Background:** Pediatric oncology is a challenge in developing countries, where public health research has traditionally focused on infectious and/or communicable disease. As awareness for chronic disease such as cancer has risen, so, too, have diagnoses and incidence.

**Methods:** We intend to retrospectively review the medical records for all pediatric cancer cases seen in the three largest hospitals in the Northwest Region of Cameroon: Mbingo Baptist Hospital (MBH), Bamenda Provincial Hospital (BPH), and Bansa Baptist Hospital (BBH) in order to better understand the scale of cancer incidence in the Northwest Region. The National Cancer Institute of the United States defines pediatric cancer as “cancers that occur between birth and 15 years of age.” The primary variables of interest are patient age, diagnosis of cancer type and stage, symptom duration prior to treatment, and outcome.

**Discussion:** By establishing baseline pediatric oncology statistics, the results of this review can help researchers and practitioners alike better understand the scope and scale of how the children of the Northwest Region of Cameroon are affected by cancer.

## **Introduction:**

Pediatric oncology is a challenge in developing countries, where public health research has traditionally focused on infectious and/or communicable disease such as malaria and HIV / AIDS. However, chronic diseases profoundly affect the developing world with high incidence, prevalence, and mortality rates. As awareness for diseases such as cancer has risen, so, too, have diagnoses and incidence.

In Cameroon, pediatric cancer presents a very serious public health concern.<sup>1</sup> However, little data exists that fully outlines the true epidemiology of all cancer, let alone pediatric cancer, in Cameroon. In 2007, the Cameroonian National Cancer Committee determined that lymphomas, specifically Burkitt’s lymphomas (BL), are the most prevalent childhood cancer found in the country<sup>2</sup>. A 2012 study examined cancer incidence across all age groups in Yaounde and found the age-standardized incidence rate for all cancers to be 53.35 cases per 100,000 people<sup>3</sup>. However, this study is not translational to this research due to the ethnic, environmental, and geographical differences between the Northwest Region and Yaounde.

The previous research most applicable to the study proposed here focused on the epidemiology specifically of BL in the Northwest Region<sup>4</sup>. The objective of that research was to identify if a relationship existed between malarial infection and BL. While no relationship was demonstrated between the two, the authors determined that the average yearly incidence rate from 2003 to 2010 of BL in the Northwest Region was 2.58 per 100,000 children.

The overarching goal of this research is to update and complete the epidemiological data on pediatric cancer in Northwest Cameroon. Developing countries across the world have seen incident rates of pediatric cancer rise over the past decade due to improved education and training for medical personnel.<sup>5</sup> Updated, comprehensive epidemiological research is necessary in order to more effectively understand the pervasiveness of the pediatric cancer problem.

**Research Question:**

What is the overall incidence of pediatric cancer for children in the Northwest Region of Cameroon in 2016-2017? How does the incidence compare to previous studies of both pediatric and overall cancer incidence in Cameroon?

**Objectives:****Primary:**

The primary objective of this research is to establish definitive pediatric cancer incidence data for the Northwest Region of Cameroon using patient data from the three largest hospitals in the region. Pediatric cancer is defined by the National Cancer Institute (U.S.A.) as “cancers that occur between birth and 15 years of age.”<sup>6</sup>

**Secondary:**

The secondary objective of this research is twofold: first, the study aims to compare the epidemiological data obtained via this research and compare it to the Enow-Orock 2012 and Lewis 2012 studies in order to determine change over time. Second, the study intends to gather peripheral data that does not relate directly to epidemiology, specifically duration of symptoms prior to a patient’s hospital visit, treatment plan used, and treatment outcome.

**Methods:**

This research protocol will be submitted for review via the institutional review board (IRB) at Mbingo Baptist Hospital. The patient data will be collected in December 2017; patient data will be complete and comprehensive from January 2016 through November 2017.

**Data sources:**

This study examines new cancer cases presented in the Northwest Region of Cameroon from January 2016 through November 2017. The patient data was collected from the three largest hospitals in the region: Mbingo Baptist Hospital (MBH), Bamenda Provincial Hospital (BPH), and Bansa Baptist Hospital (BBH).

**Data synthesis:**

Demographic data will be collected by Rohit Borah, a published public health researcher trained at the University of Alabama at Birmingham in Birmingham, AL, U.S.A. The demographic data collected includes patient name, age, gender, height, weight, the hospital at which the patient was treated, and admission date.

Oncology data will be collected by both Dr. Francine Kouya, the pediatric oncology specialist at MBH, and Rohit Borah. This data includes the type of cancer diagnosed, the stage at which the patient was diagnosed, the length of time the patient experienced symptoms, the treatment administered, and the inpatient outcome.

Each patient will be assigned a unique identifier for the purpose of this study in order to ensure that the patients’ identities and health information remain secure and private.

### Data management and analysis:

All statistical coding, organization and analyses will be conducted using RStudio<sup>7</sup> and Microsoft Excel. Any graphs, charts or graphics created solely for the purpose of this research will be created via the “ggplot2” R package<sup>8</sup>. Descriptive statistics for both the variables in question and the key performance indicators will be tabulated via R.

The primary data this research aims to provide is the incidence for pediatric cancer in Northwest Cameroon. The Centers for Disease Control and Prevention (U.S.A.) defines incidence as “the occurrence of new cases of disease or injury in a population over a specified period of time.”<sup>9</sup>

Incidence is determined via the following equation:  $\frac{N \text{ new disease onsets}}{\text{Population}} \times 100,000$ .

In order to accurately assess the pediatric population for the Northwest Region, the researchers extrapolated data from the 2010 Cameroonian national census and the 2017 population estimate of the Central Intelligence Agency (U.S.A.) World Factbook.<sup>10,11</sup> These calculations are below:

| <b>Cameroon Population Statistics:</b> |                         |                   |                             |                   |
|----------------------------------------|-------------------------|-------------------|-----------------------------|-------------------|
|                                        | <b>Total Population</b> | <b>% Of Total</b> | <b>Pediatric Population</b> | <b>% Of Total</b> |
| <b>Cameroon (2010)</b>                 | 19,406,100              | -                 | 8,465,364                   | 43.62%            |
| <b>Cameroon (2017)</b>                 | 24,994,885              | -                 | 10,594,905                  | 42.39%            |
| <b>Northwest (2010)</b>                | 1,804,695               | 9.30%             | 776,113*                    | 43.01%            |
| <b>Northwest (2017)</b>                | 2,324,431*              | 9.30%             | 996,627*                    | 43.01%            |

\*Estimated population parameter based on YoY population growth

### Discussion:

Research has found that 80% of all children and adolescents diagnosed with cancer are in the developing world, and their chance for successful treatment and access to quality care are significantly lower than their counterparts in developed countries<sup>12</sup>. While protocols and resources such as the International Society of Pediatric Oncology (SIOP) Africa and the PODC Collaborative Wilms Tumor Project exist to assist both patients and providers, considerable work still needs to be done in order to help children with cancer in developing countries achieve the same outcomes as children in developed countries.<sup>13</sup>

With the increasing incidence of pediatric cancers in developing countries across the world, a critical need exists to ensure that the epidemiological evidence used in practice and policymaking is of high quality. This research aims to provide comprehensive epidemiological data on pediatric cancer in the Northwest Region of Cameroon for the very first time.

Cameroon as a country has considerable growth to attain from a healthcare standpoint. While its GDP of \$77.1B (2016) ranks 94<sup>th</sup> in the world, Cameroon’s health expenditure rate of 4.1% of GDP ranks only 164<sup>th</sup>.<sup>11</sup> Furthermore, Cameroon has few physicians when compared to the rest of the world, averaging one physician per 12,500 people (2010). This has resulted in Cameroon’s poor scores in the 2015 United Nations Human Development Index, ranking 178<sup>th</sup> in health and 151<sup>st</sup> in living standards.<sup>14</sup> In order to maximize public health in Cameroon, it is imperative to conduct research like the study proposed in this protocol. By better understanding the size and nature of endemic problems such as pediatric cancer, every stakeholder involved in public health, from healthcare providers to policymakers to public health practitioners to patients themselves, can be more effective.

## References:

1. Enow-Orock GE, Pondy A, Doumbe P, Koki N, Lemerle J. A pediatric oncology group pilot study on childhood cancers at the Chantal Biya Foundation Yaounde, Cameroon: report of 350 cases. *Sci Res Essays*. 2012;7:2237-2241.
2. Doh AS. National Cancer Control Committee: Practical Guide. 2007;1.
3. Enow-Orock GE, Ndom P, Doh AS. Current cancer incidence and trends in Yaounde, Cameroon. *Oncol Gastroenterol Hepatol Reports*. 2012;1(1):6.
4. Lewis N, Young J, Hesselning PB, McCormick P, Wright N. Epidemiology of Burkitt's lymphoma in Northwest Province. *Paediatr Int Child Health*. 2012;32:82-85.
5. Afungchwi GM, Hesselning PB, Ladas EJ. The role of traditional healers in the diagnosis and management of Burkitt lymphoma in Cameroon: understanding the challenges and moving forward. *BMC Complement Altern Med*. 2017;17(209).
6. National Cancer Institute. NCI Dictionary of Cancer Terms. <https://www.cancer.gov/publications/dictionaries/cancer-terms?cdrid=728326>, 2017.
7. *R: A language and environment for statistical computing*. [computer program]. 2017.
8. Wickham H. ggplot2: Elegant Graphics for Data Analysis. *Springer-Verlag*. 2009.
9. Centers for Disease Control and Prevention. Morbidity Frequency Measures. 2012; <https://www.cdc.gov/ophss/csels/dsepd/ss1978/lesson3/section2.html>, 2017.
10. La Population du Cameroun. In: Institut National de la Statistique du Cameroun, ed. Yaounde, Cameroon: Republique du Cameroun; 2010.
11. The World Factbook 2017. In: Central Intelligence Agency, ed. Washington, DC2017.
12. Rodriguez-Galindo C, Friedrich P, Alcasabas P, et al. Toward the Cure of All Children With Cancer Through Collaborative Efforts: Pediatric Oncology As a Global Challenge. *J Clin Oncol*. 2015;33(27):3065-3073.
13. Israels T, Kambugu J, Kouya F. Clinical trials to improve childhood cancer care and survival in sub-Saharan Africa. *Nat Rev Clin Oncol*. 2013;1010:599-604.
14. Human Development Report 2015. In: United Nations, ed. New York, NY2015.
